# Supplementary material for: Topological phases, local magnetic moments, and spin polarization triggered by C558-line defects in armchair graphene nanoribbons
Source: Royal Society of Chemistry journal article supplement (doi:10.1039/d4cp00585f), 2024-01-01
Supplement: d4cp00585f1.pdf [file d4cp00585f1.pdf]

## Supplementary materials

### Topological Phases, Local Magnetic Moments, and Spin Polarization Triggered by $C_{558}$ -Line Defects in Armchair Graphene Nanoribbon

Ning-Jing Yang<sup>1,2</sup>, Wen-Ti Guo<sup>1,2</sup>, Hai Yang<sup>3</sup>, Zhigao Huang<sup>1,2</sup>, and Jian-Min Zhang<sup>1,2\*</sup>

*1 Fujian Provincial Key Laboratory of Quantum Manipulation and New Energy Materials,*

*College of Physics and Energy, Fujian Normal University, Fuzhou 350117, China*

*2 Fujian Provincial Collaborative Innovation Center for Advanced High-Field*

*Superconducting Materials and Engineering, Fuzhou, 350117, China and*

*3 School of Physics Science and Technology, Kunming University, Kunming 650214, China*

(Dated: April 11, 2024)

#### I. THE 3P RULE OF BAND STRUCTURES

In this section, we introduce the periodic band structures related to the nanoribbon width, as shown in Fig. S1. Although we show the bands for only two periods, it is sufficient to observe the dispersion pattern of the bands within the  $\Gamma - X$  interval. When  $w = 3p + 2$ , the pair of Dirac points appears in the  $k_x$  direction, while this property is not present for other widths of nanoribbons. It is worth noting that when the width  $w$  characterizing the nanoribbon is even, the symmetry of the system is different and the unit cell is rhombic, as shown in Fig. S1(h). However, this difference does not affect the properties of the system in the  $k_x$  direction. This periodicity is identical to that of the armchair nanoribbons. The reason for this is due to the interleaved  $C_{558}$ -line defects, which break the original periodicity and add a full wavelength, so that this armchair interface condition also exhibits three-periodicity in the defect structure, as is the case for other similar materials.

---

\*Corresponding author: jmzhang@fjnu.edu.cn

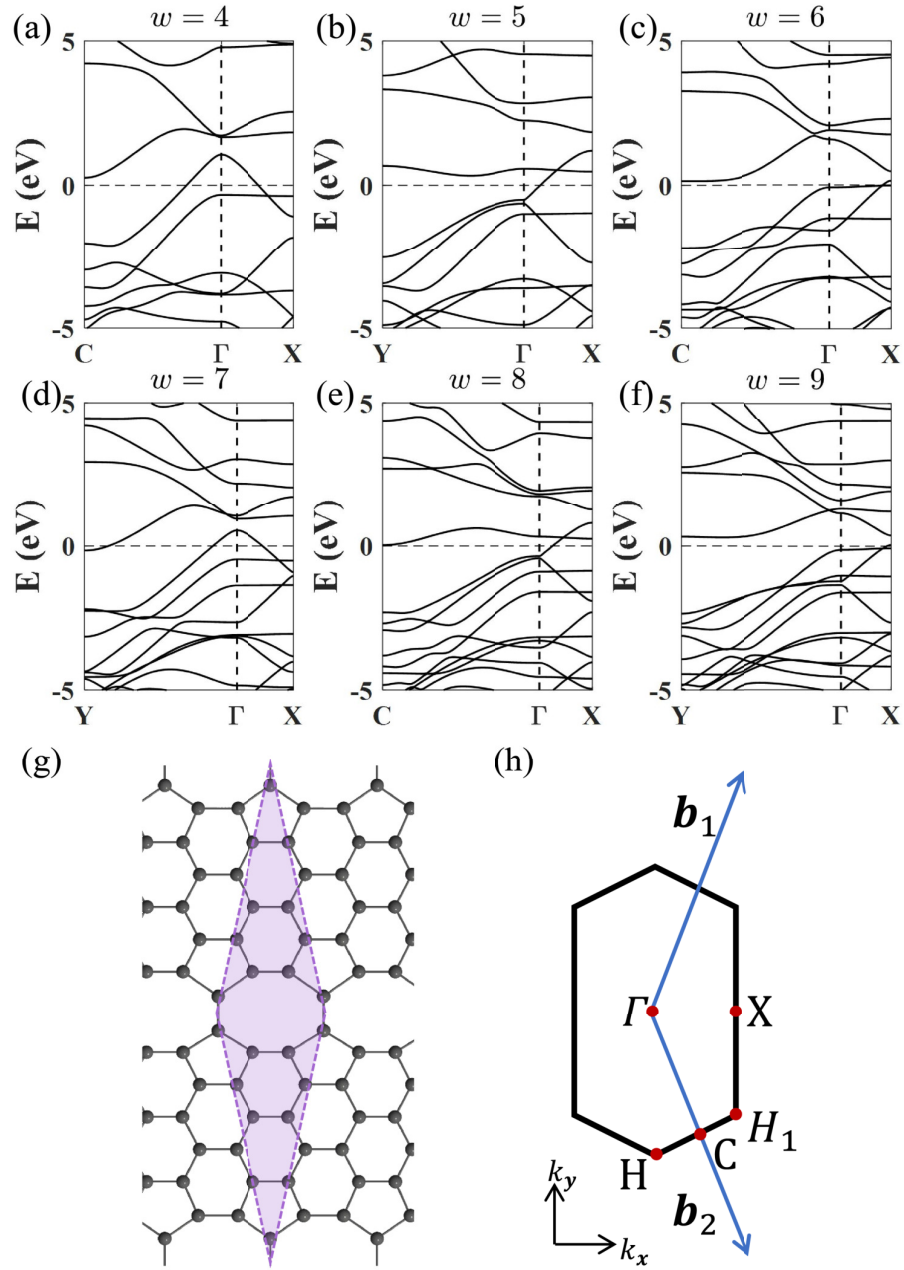

FIG. S1: (a-f) Band structures corresponding to  $w = 4 \sim 9$ . (g) If  $w$  is an even number, the form of a single cell; And the first Brillouin zone and its high symmetry point,  $b_1$  and  $b_2$  are two reciprocal basis vectors appearing in (h).
